# Supplementary material
Source: ML conference proceedings conference paper supplement (https://openreview.net/forum?id=1s1T7xHc5l6)
Supplement: supplementary_material [file attachment]

# FILTRA: RETHINKING STEERABLE CNN BY FILTER TRANSFORM

## APPENDIX

**Anonymous authors**

Paper under double-blind review

### A VERIFICATION OF LEMMA 1 ON (22)

(22) can be verified to follow Lemma 1 as:

$$\begin{aligned} \mathbf{K}_{k \rightarrow \text{reg}}^{C_N}(\phi + \theta_{i_1}) &= \text{diag}(P(i_1)\mathbf{K})\beta_k, \quad \text{c.f. (17b)} \\ &= P(i_1) \text{diag}(\mathbf{K})P(i_1)^{-1}\beta_k = \rho_{\text{reg}}^{C_N}(g)\mathbf{K}_{k \rightarrow \text{reg}}^{C_N}\psi_{0,k}(g)^{-1}, \quad \text{c.f. (11a).} \end{aligned} \quad (27)$$

We can also verify this for

$$\bar{\mathbf{K}}_{k \rightarrow \text{reg}}^{C_N} = \text{diag}(\bar{\mathbf{K}})\beta_k. \quad (28)$$

### B VERIFICATION OF LEMMA 1 ON (23)

First note it is easy to verify that for  $i_0 = 0$ , i.e.  $g = (0, i_1)$ , the Lemma 1 holds in the same way as (27),

$$\mathbf{K}_{j,k \rightarrow \text{reg}}^{D_N}(\phi + \theta) = \rho_{\text{reg}}^{D_N}(g)\mathbf{K}_{j,k \rightarrow \text{reg}}^{D_N}\psi_{j,k}(g)^{-1}. \quad (29)$$

We then generalize (20) on  $\mathbf{K}_{k \rightarrow \text{reg}}^{C_N}$  and  $\bar{\mathbf{K}}_{k \rightarrow \text{reg}}^{C_N}$  given a reflected action  $g = (1, i_1)$ :

$$\mathbf{K}_{k \rightarrow \text{reg}}^{C_N}(-\phi + \theta_{i_1}) = \text{diag}(\mathbf{K}(-\phi + \theta_{i_1}))\beta_k = B(i_1) \text{diag}(\bar{\mathbf{K}})B(i_1)^{-1}\beta_k, \quad \text{c.f. (11b)} \quad (30a)$$

$$= B(i_1) \text{diag}(\bar{\mathbf{K}})\beta_k\psi_{0,k}(g)^{-1} = -B(i_1) \text{diag}(\bar{\mathbf{K}}^{C_N})\beta_k\psi_{1,k}(g)^{-1} \quad (30b)$$

$$= B(i_1) \text{diag}(\mathbf{K}^{C_N})\beta_k\psi_{0,k}(g)^{-1} = -B(i_1) \text{diag}(\mathbf{K}^{C_N})\beta_k\psi_{1,k}(g)^{-1}. \quad (30c)$$

Note that (30b) and (30c) both have two equivalent forms denoted with  $\psi_{0,k}(g)$  and  $\psi_{1,k}(g)$  respectively. Now we can show  $\mathbf{K}_{j,k \rightarrow \text{reg}}^{D_N}$  follows Lemma 1 for  $j = 0$ ,  $i_0 = 1$ , i.e.  $g = (1, i_1)$  as:

$$\mathbf{K}_{j,k \rightarrow \text{reg}}^{D_N}(-\phi + \theta_{i_1}) = \left[ \mathbf{K}_{k \rightarrow \text{reg}}^{C_N}(-\phi + \theta_{i_1})^\top \quad \bar{\mathbf{K}}_{k \rightarrow \text{reg}}^{C_N}(-\phi + \theta_{i_1})^\top \right]^\top \quad (31a)$$

$$= \left[ B(i_1) \text{diag}(\bar{\mathbf{K}}^{C_N})\beta_k\psi_{0,k}(g)^{-1} \quad B(i_1) \text{diag}(\mathbf{K}^{C_N})\beta_k\psi_{0,k}(g)^{-1} \right]^\top \quad \text{c.f. (30b)} \quad (31b)$$

$$= \rho_{\text{reg}}^{D_N}(g) \left[ \mathbf{K}_{k \rightarrow \text{reg}}^{C_N}^\top \quad \bar{\mathbf{K}}_{k \rightarrow \text{reg}}^{C_N}^\top \right]^\top \psi_{0,k}(g)^{-1} \quad \text{c.f. (22), (28)} \quad (31c)$$

$$= \rho_{\text{reg}}^{D_N}(g)\mathbf{K}_{j,k \rightarrow \text{reg}}^{D_N}\psi_{0,k}(g)^{-1}. \quad (31d)$$

The verification is similar for  $j = 1$ ,  $i_0 = 1$ , i.e.  $g = (1, i_1)$ :

$$\mathbf{K}_{j,k \rightarrow \text{reg}}^{D_N}(-\phi + \theta_{i_1}) = \left[ \mathbf{K}_{k \rightarrow \text{reg}}^{C_N}(-\phi + \theta_{i_1})^\top \quad -\bar{\mathbf{K}}_{k \rightarrow \text{reg}}^{C_N}(-\phi + \theta_{i_1})^\top \right]^\top \quad (32a)$$

$$= \left[ -B(i_1) \text{diag}(\bar{\mathbf{K}}^{C_N})\beta_k\psi_{1,k}(g)^{-1} \quad B(i_1) \text{diag}(\mathbf{K}^{C_N})\beta_k\psi_{1,k}(g)^{-1} \right]^\top \quad \text{c.f. (30b)} \quad (32b)$$

$$= \rho_{\text{reg}}^{D_N}(g) \left[ \mathbf{K}_{k \rightarrow \text{reg}}^{C_N}^\top \quad -\bar{\mathbf{K}}_{k \rightarrow \text{reg}}^{C_N}^\top \right]^\top \psi_{0,k}(g)^{-1} \quad \text{c.f. (22), (28)} \quad (32c)$$

$$= \rho_{\text{reg}}^{D_N}(g)\mathbf{K}_{j,k \rightarrow \text{reg}}^{D_N}\psi_{0,k}(g)^{-1}. \quad (32d)$$

## C VERIFICATION OF LEMMA 1 ON (25)

This kernel can be verified as follows for  $g = (0, i_1)$ :

$$\mathbf{K}_{\text{reg} \rightarrow \text{reg}}^{\mathbf{C}_N}(\phi + \theta_{i_1}) = \left[ \rho_{\text{reg}}^{\mathbf{C}_N}(g) \mathbf{K}_{0 \rightarrow \text{reg}}^{\mathbf{C}_N} \psi_{0,0}(g)^{-1}, \dots, \rho_{\text{reg}}^{\mathbf{C}_N}(g) \mathbf{K}_{\lfloor \frac{N}{2} \rfloor \rightarrow \text{reg}}^{\mathbf{C}_N} \psi_{0, \lfloor \frac{N}{2} \rfloor}(g)^{-1} \right] V^{-1} \quad (33a)$$

$$= \rho_{\text{reg}}^{\mathbf{C}_N}(g) \left[ \mathbf{K}_{0 \rightarrow \text{reg}}^{\mathbf{C}_N} \cdots \mathbf{K}_{\lfloor \frac{N}{2} \rfloor \rightarrow \text{reg}}^{\mathbf{C}_N} \right] D^{\mathbf{C}_N} V^{-1} \quad (33b)$$

$$= \rho_{\text{reg}}^{\mathbf{C}_N}(g) \left[ \mathbf{K}_{0 \rightarrow \text{reg}}^{\mathbf{C}_N} \cdots \mathbf{K}_{\lfloor \frac{N}{2} \rfloor \rightarrow \text{reg}}^{\mathbf{C}_N} \right] V^{-1} V D^{\mathbf{C}_N} V^{-1} = \rho_{\text{reg}}^{\mathbf{C}_N}(g) \mathbf{K}_{\text{reg} \rightarrow \text{reg}}^{\mathbf{C}_N} \rho_{\text{reg}}^{\mathbf{C}_N}{}^{-1}. \quad (33c)$$
